# Supplementary material for: An N-Cadherin 2 expressing epithelial cell subpopulation predicts response to surgery, chemotherapy and immunotherapy in bladder cancer
Source: PubMed Central journal article supplement (PMC8361097; doi:10.1038/s41467-021-25103-7), 2021-08-12
Supplement: 41467_2021_25103_MOESM1_ESM.pdf [file 41467_2021_25103_MOESM1_ESM.pdf]

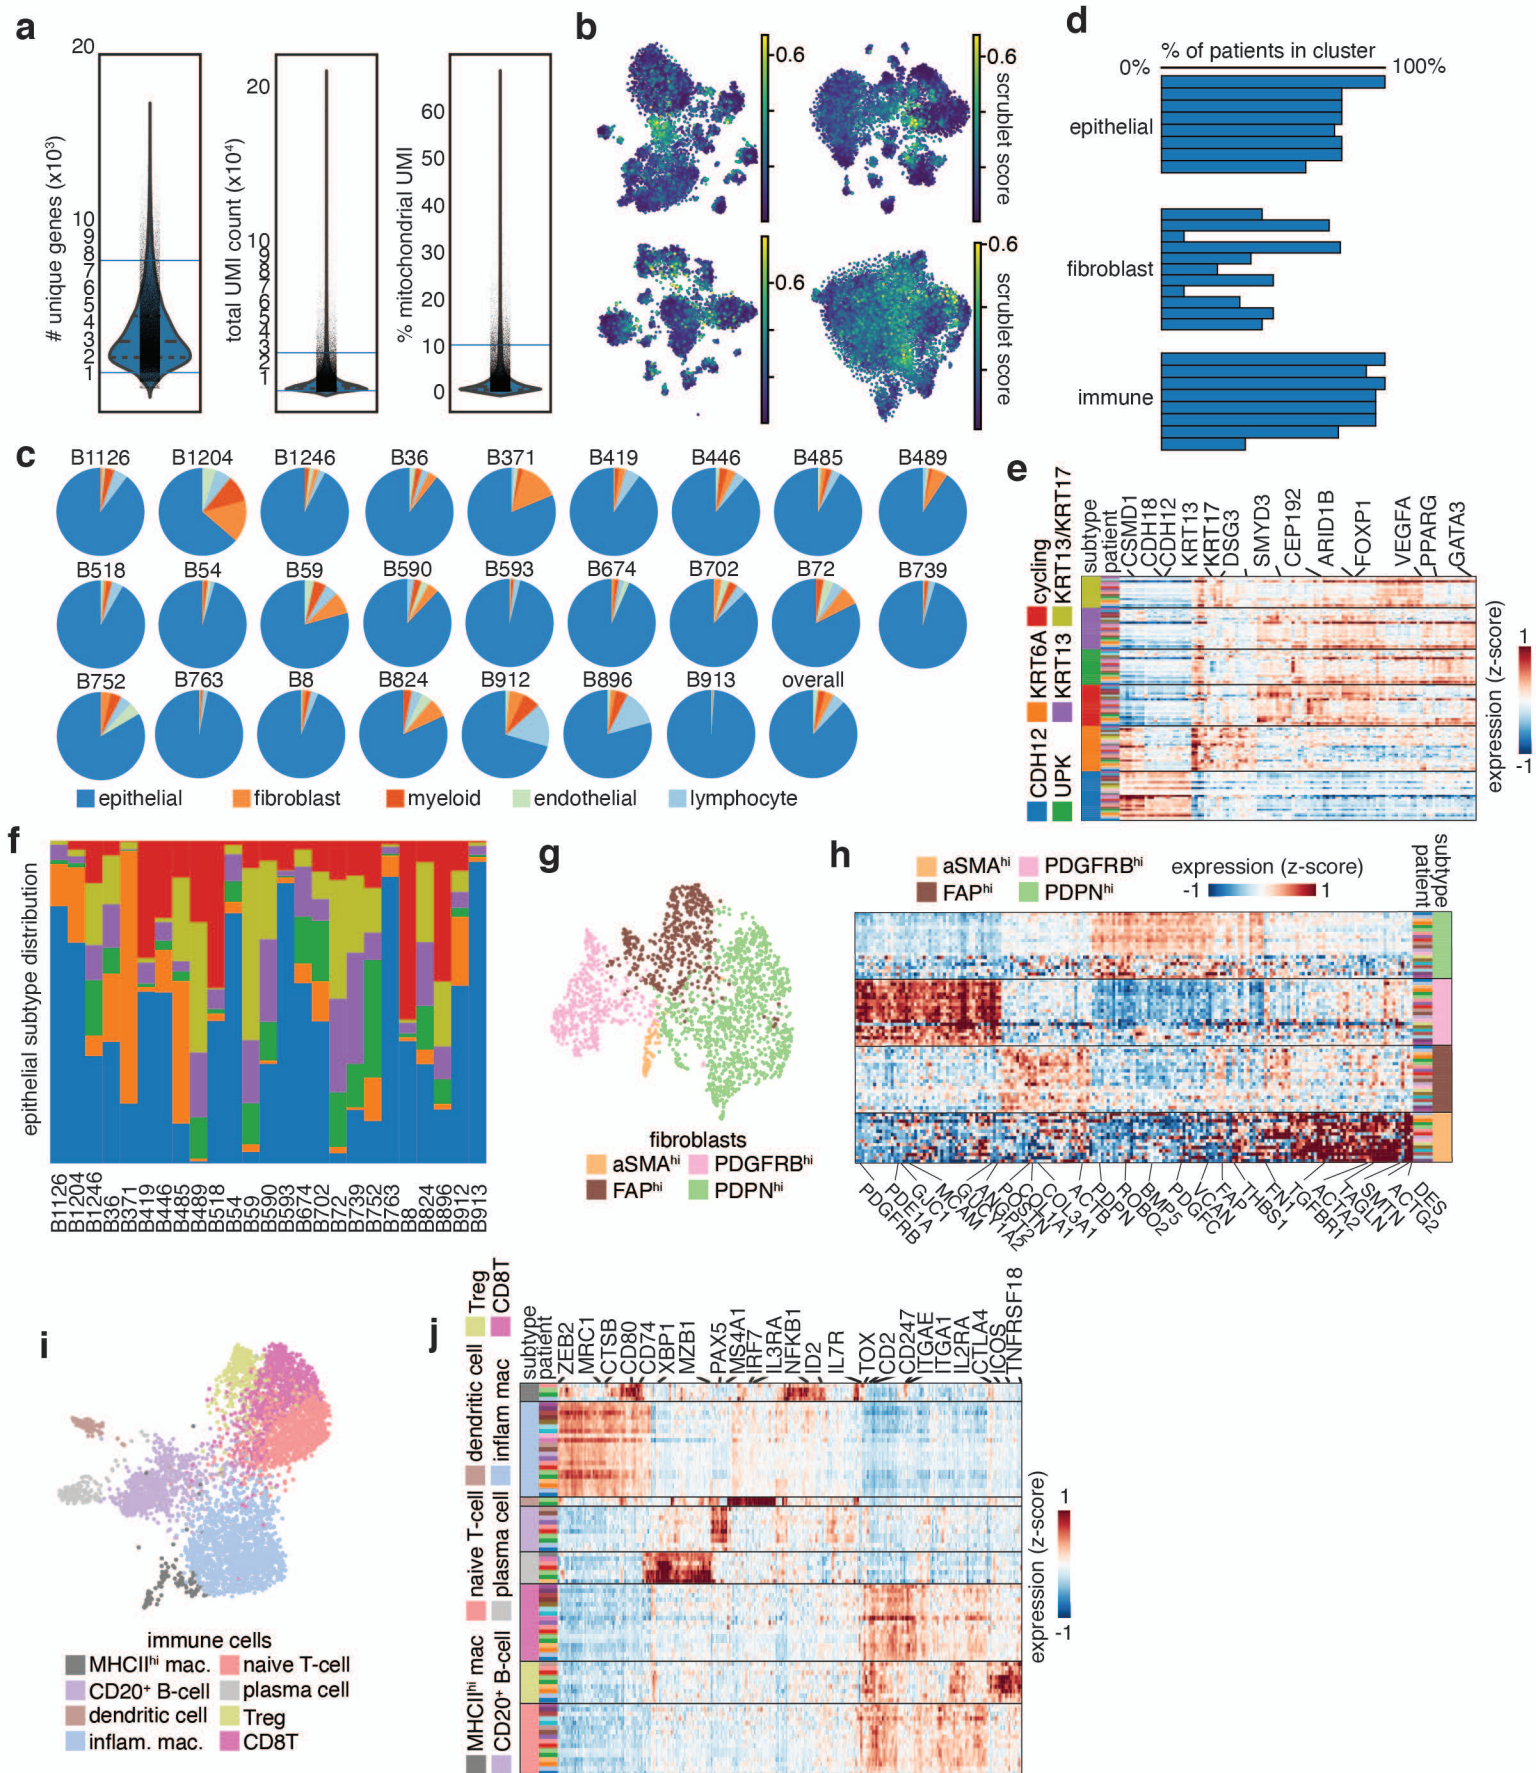

**Supplementary Figure 1) Single nucleus sequencing of the MIBC tumor microenvironment.** **a**, QC metrics for MIBC snSeq dataset where the blue horizontal lines represent the top and bottom 5<sup>th</sup> percentiles for the number of unique genes and total UMI or the 10% threshold for the UMI percent mitochondrial-coding genes. **b**, Scrublet scores for each of the histologically-normal bladder samples. **c**, snSeq population proportions in 25 muscle invasive bladder tumors, and the overall combined population proportions. **d**, Percent of patients analyzed that are represented in each of the unsupervised clusters using the scVI method. **e**, Average gene expression per patient of marker genes for each epithelial population in **Main Fig 1d**. **f**, Epithelial population distribution for each patient analyzed, colors correspond with **e**. **g**, UMAP of fibroblasts (2,075 nuclei) from MIBC tumors colored by unsupervised clustering. **h**, UMAP of immune cells (6,121 nuclei) from MIBC tumors colored by unsupervised clustering. **i**, Average gene expression per patient of marker genes for each fibroblast population in **g**. **j**, Average gene expression per patient of marker genes for each immune population in **h**. Gene expression values shown as  $\log(\text{CP10k} + 1)$ , heatmaps show average gene expression per cluster and z-scored within each patient.

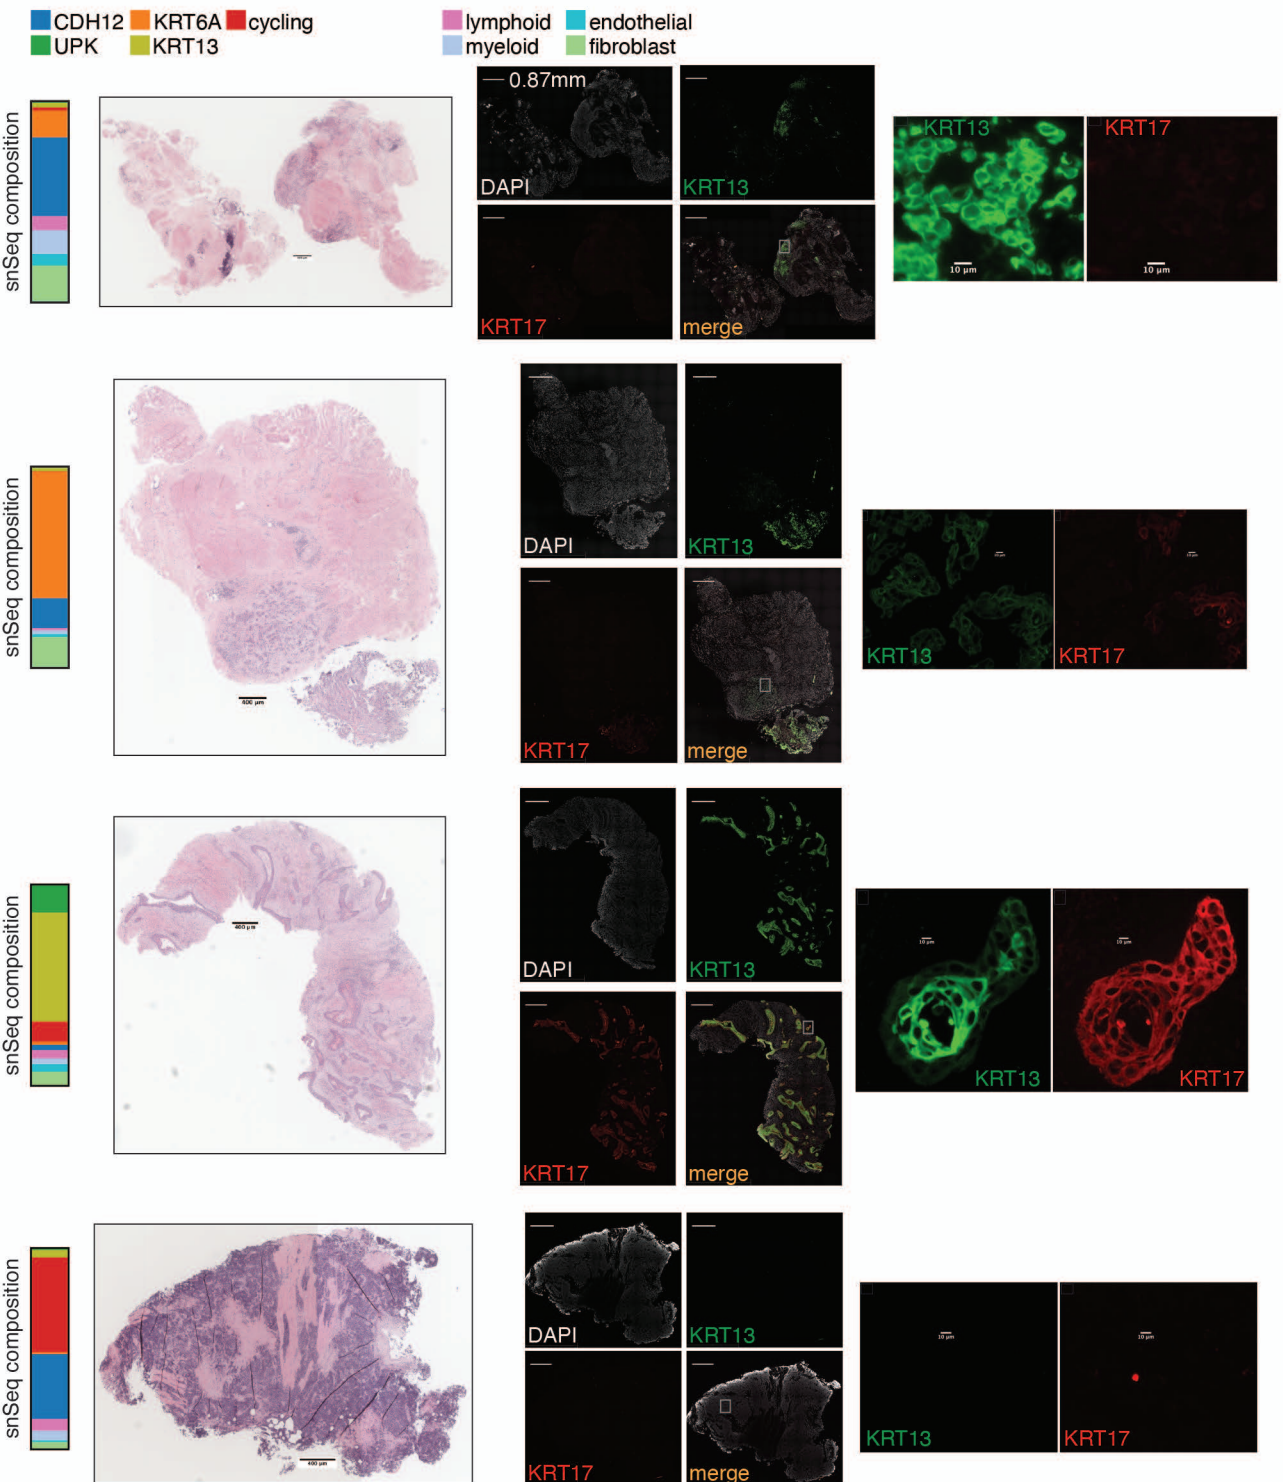

**Supplementary Figure 2) Immunohistochemistry validation of KRT13 and KRT17 expression in 4 tumors from MIBC cohort. Scale bars are 400µm, 870µm, and 10µm in the left, middle, and right columns, respectively.**

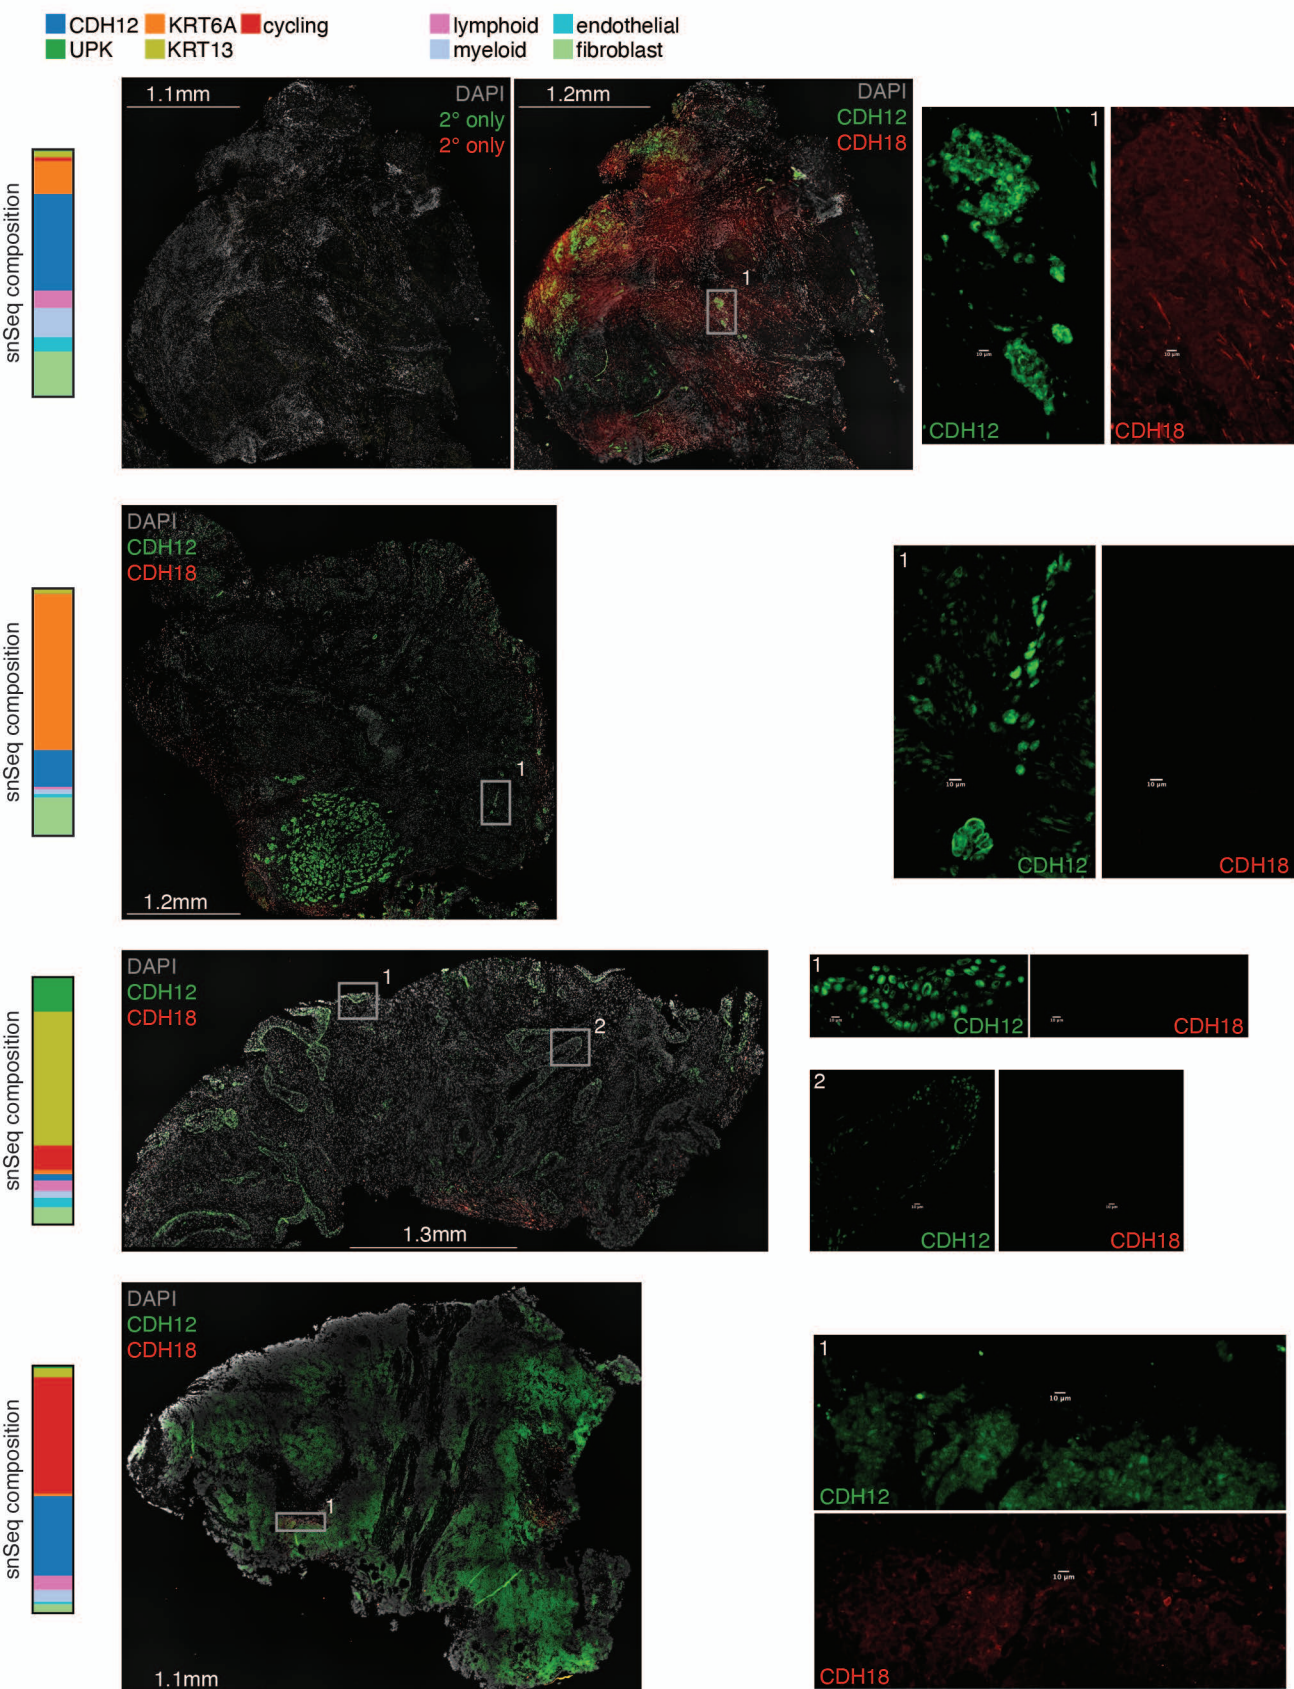

**Supplementary Figure 3) Immunohistochemistry validation of CDH12 and CDH18 expression in 4 tumors from MIBC cohort. Scale bars in the left column are shown with their respective lengths and scale bars in the right column are 10µm.**

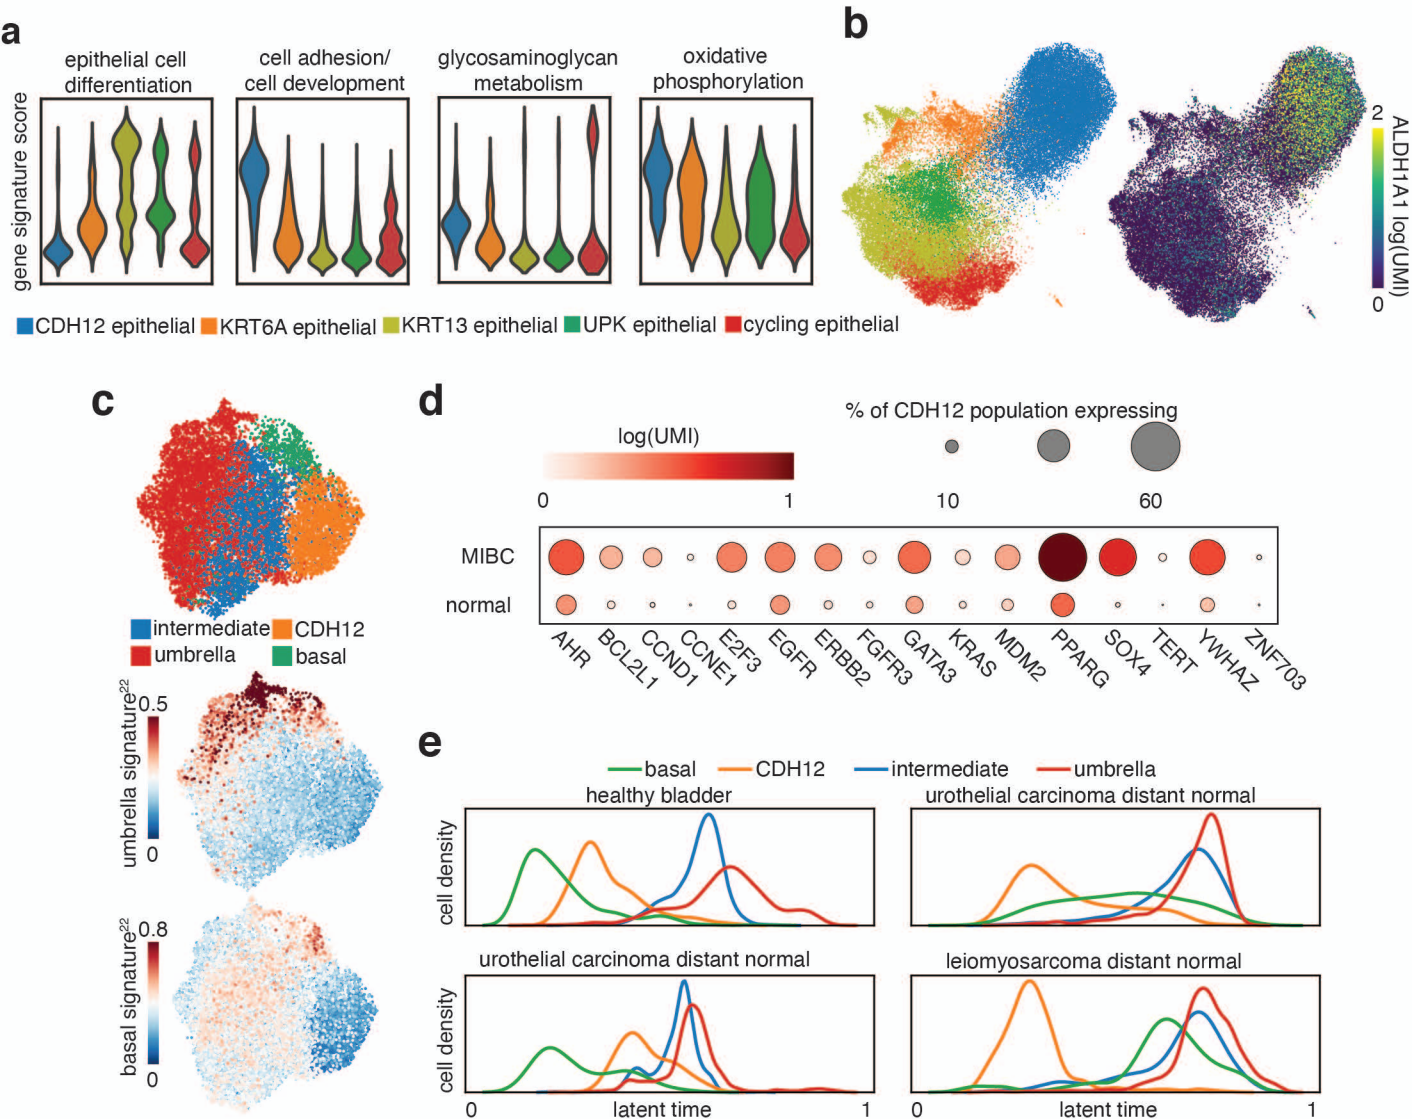

**Supplementary Figure 4) Single nucleus sequencing of healthy bladders.** **a**, Gene signature scores of co-expression modules identified in **Main Fig. 1g** separated by epithelial population. **b**, Epithelial populations (left, same as **Main Fig 1d**) and *ALDH1A1* expression in the MIBC epithelial nuclei (right). **c**, Normal bladder epithelial populations (left, same as **Main Fig. 2a**) and umbrella (middle) and basal (right) cell gene signature scores in 12,819 epithelial nuclei from histologically-normal bladders. **d**, Expression of genes commonly overexpressed in bladder cancers in MIBC versus normal bladder CDH12 populations. **e**, Density plots of the healthy bladder epithelial populations ordered by latent time in each of the 4 histologically-normal bladder tissues that were profiled.

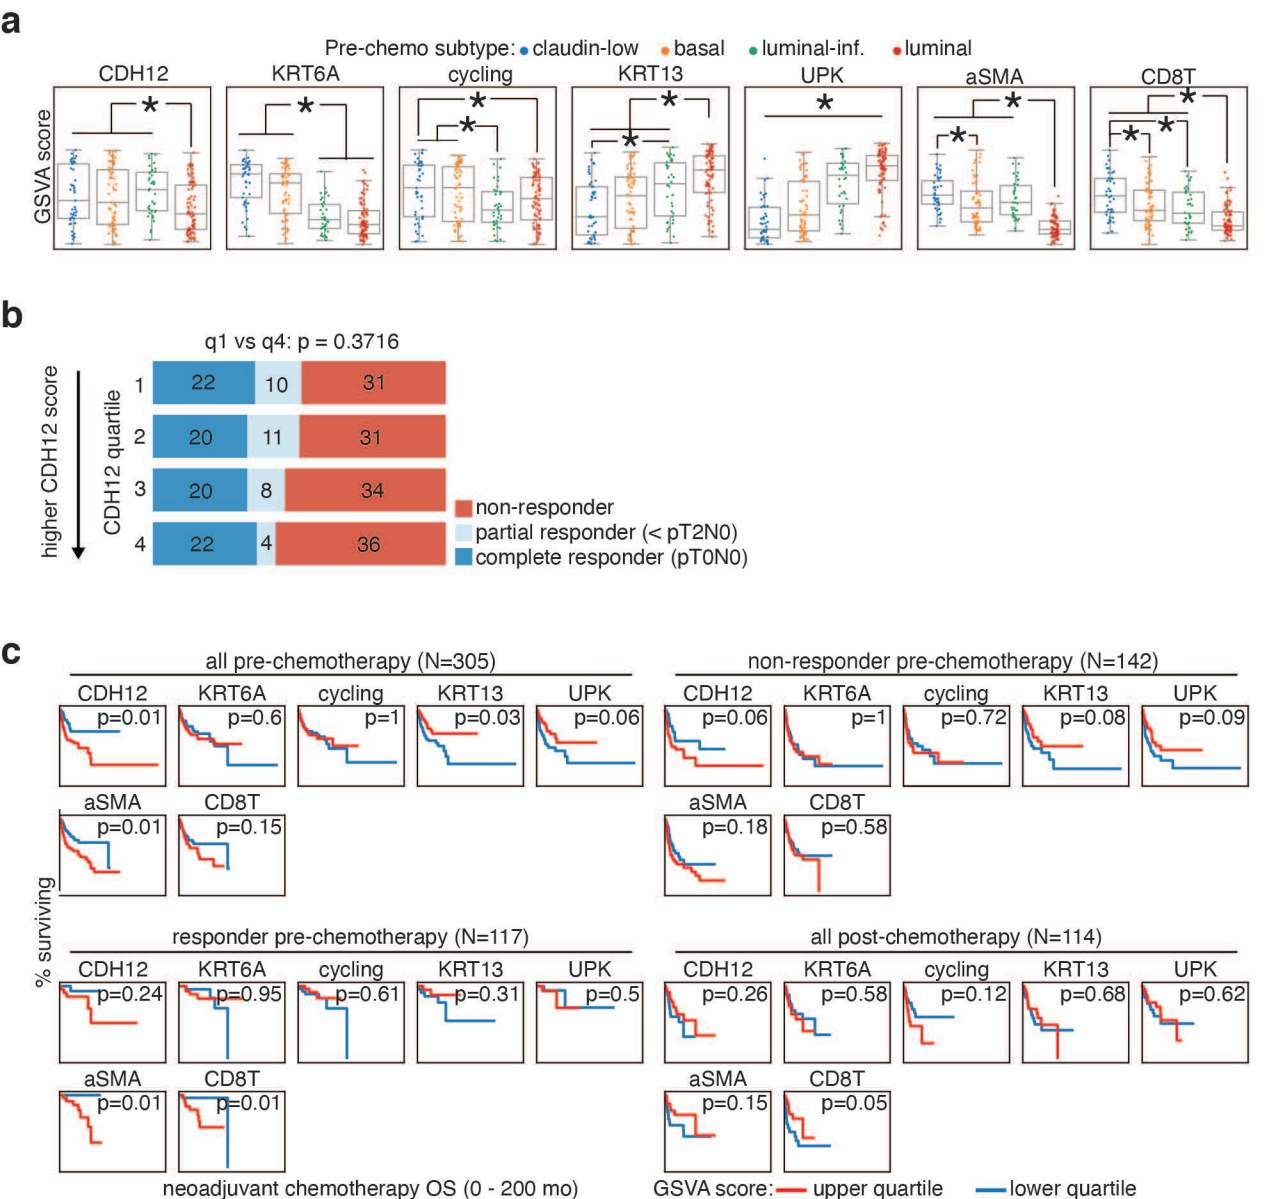

**Supplementary Figure 5) snSeq-derived gene signatures in NAC-treated tumors. a,** snSeq-derived population signatures in pre-NAC samples per Genomic Subtyping Classifier subtype ( $n=81$  for luminal,  $n=59$  for basal,  $n=45$  for claudin-low, and  $n=38$  for luminal-infiltrated (luminal-inf.)) (\* indicates two-sided Mann-Whitney  $p \leq 0.05$ . Boxplots are drawn as the inter-quartile range (IQR) with a line indicating the median, and outliers defined as points that fall outside of the range demarcated by  $1.5 \times \text{IQR}$ . **b,** Pathological downstaging of NAC-treated MIBC stratified by pre-NAC CDH12 score quartiles (log-rank test upper versus lower quartiles). **c,** Overall survival in NAC-treated MIBC stratified by snSeq-derived population signatures (log-rank test upper versus lower quartiles). Response was defined as pathologic downstaging (< pT2N0).

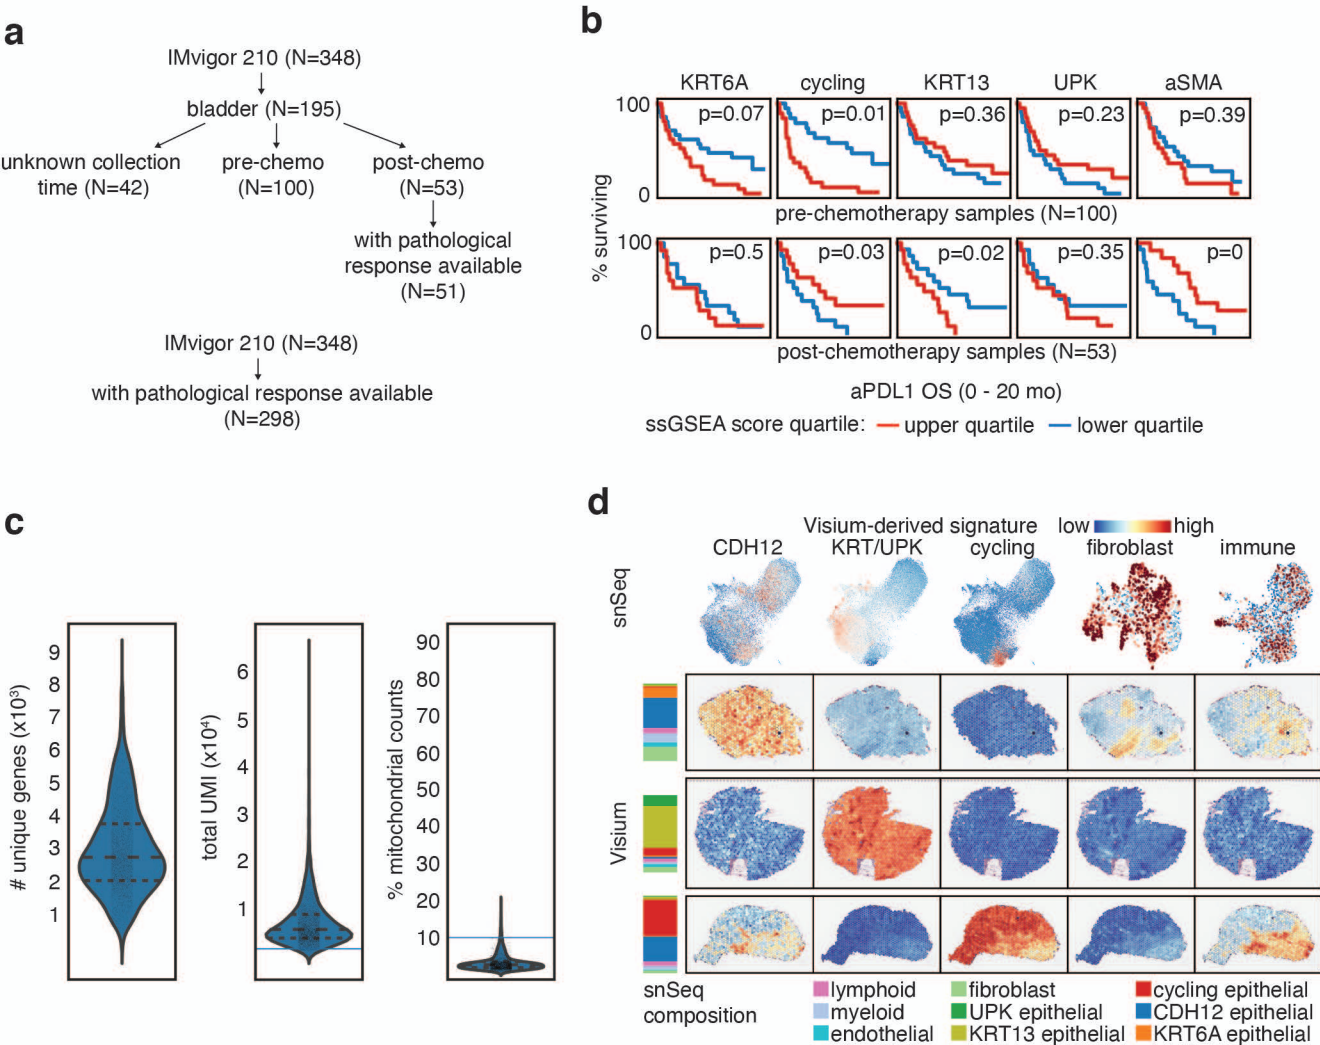

**Supplementary Figure 6) Survival prediction in IMvigor 210 by snSeq-derived gene signatures.** **a**, Diagram showing cohort selection for IMvigor 210 analyses. The sample numbers indicate number of samples fitting those criteria for which sequencing data is available. The top diagram shows the selection for the survival analyses and response predictions for all figures except **Main Fig. 6a**. The bottom diagram shows the selection for the response predictions in **Main Fig. 6a**. **b**, Overall survival in IMvigor 210 Cohort 2 bladder tumors sequenced pre-chemo (top, N = 100) or post-chemo (bottom, N = 53) stratified by snSeq-derived population signature scores (log-rank test between top and bottom quartiles;  $p = 0$  indicates  $p < 0.001$ ). **c**, QC metrics for Visium dataset where the blue horizontal lines show the cutoffs used for filtering spots. **d**, Visium-derived signature scores in snSeq UMAs (top) and in-situ on MIBC Visium samples (bottom). Stacked bar plots to the left of each Visium sample show the corresponding snSeq population composition.

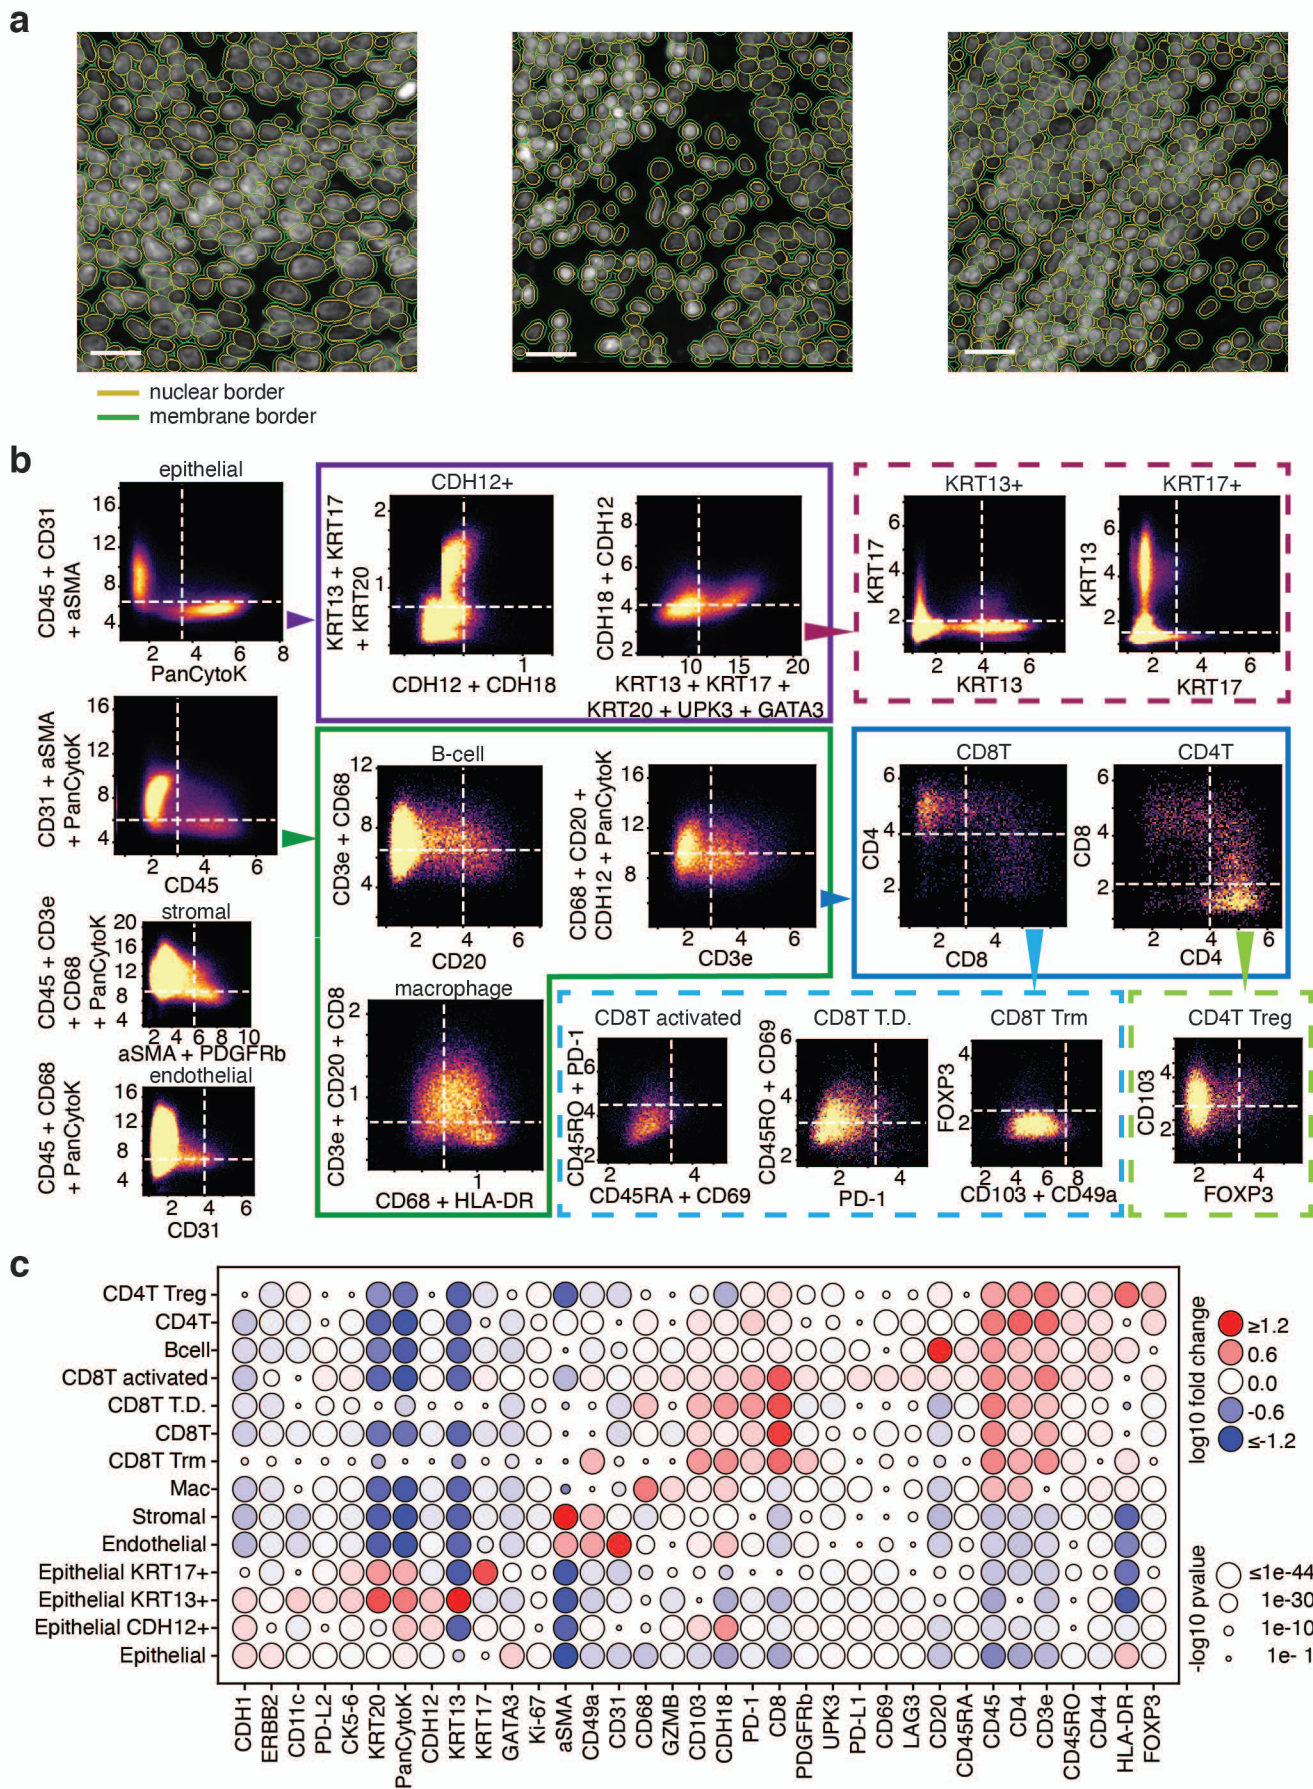

**Supplementary Figure 7) CODEX cell type classification and niche identification.** **a**, Example images showing nuclei (DAPI) with nuclear and membrane borders overlaid. Scale bar is 25 $\mu$ m. **b**, CODEX marker intensity gating strategy used to gather training samples for cell subtyping. Cells were partitioned in a hierarchical fashion using combinations of cell lineage markers. When multiple markers are indicated on the same axis, these values were summed together for each cell. Plots outlined in a solid border were used for primary cell typing, and those outlined in a dashed border refer to intensity gates applied to primarily classified cells. **c**, CODEX marker intensity enrichment per cell subtype. Dot hue reflects the log<sub>10</sub> fold change, and the size of the dot indicates the Wilcoxon (two-sided) test p-value.

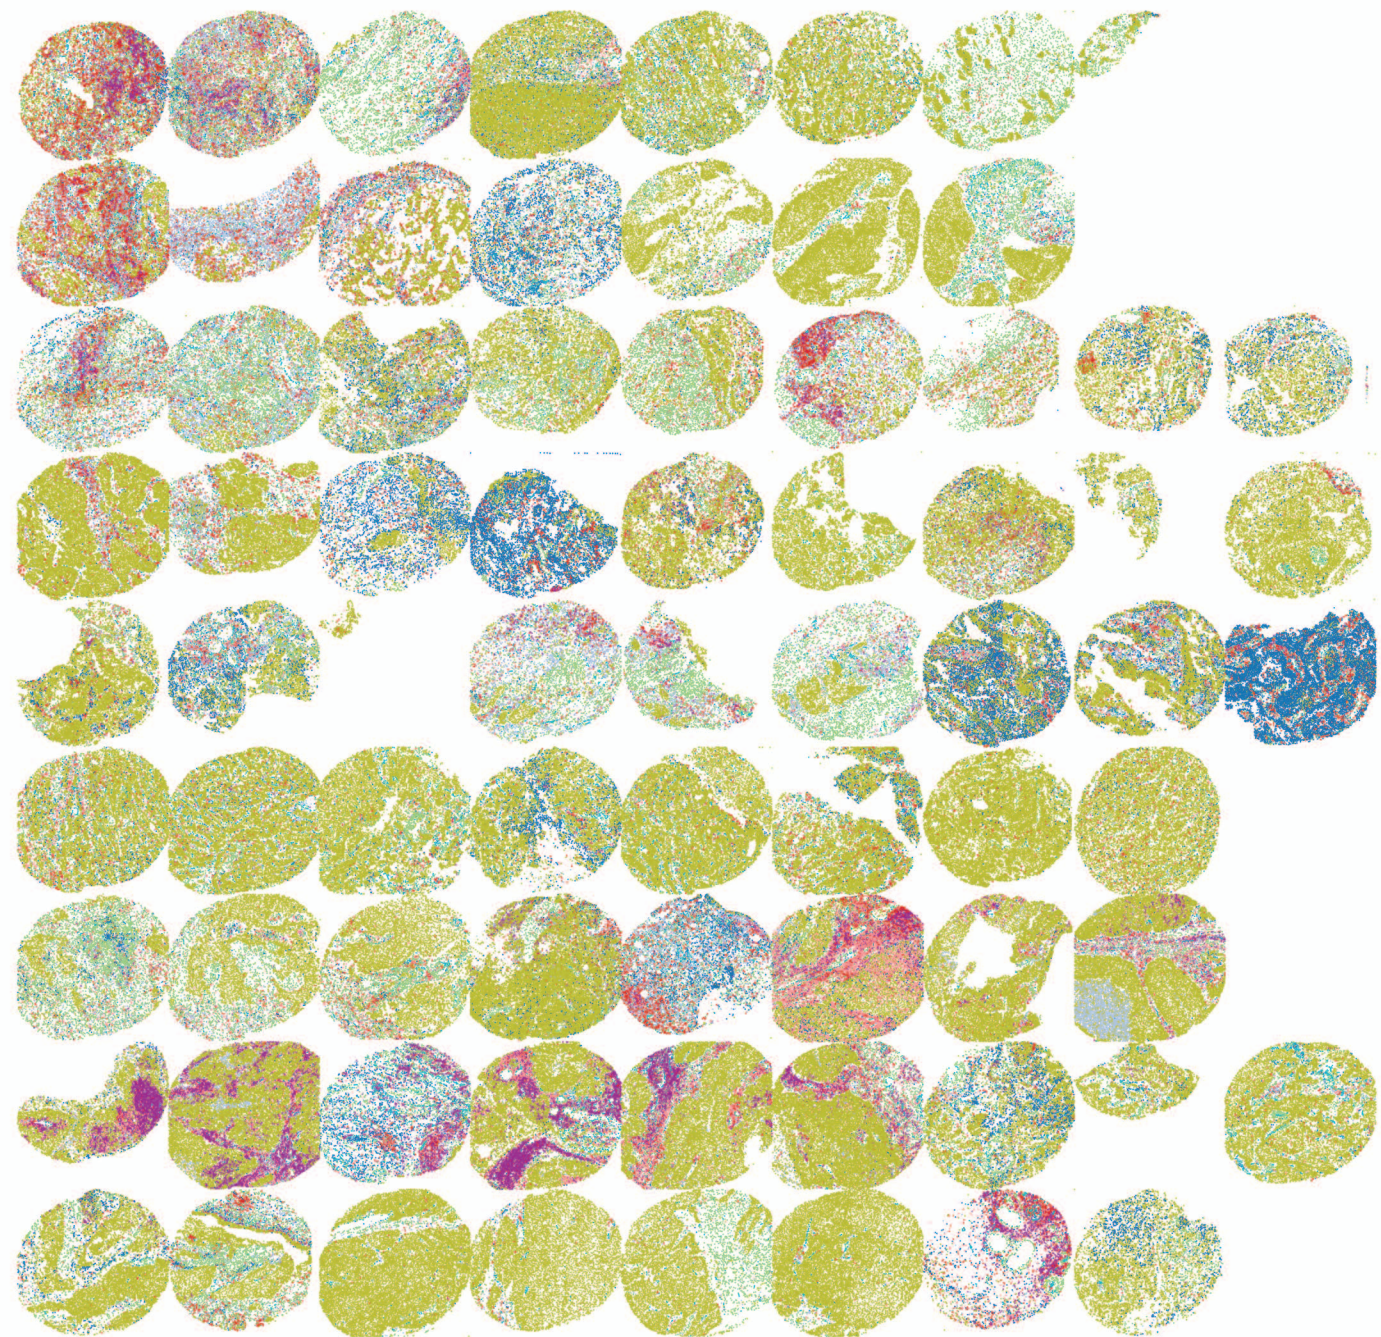

- Bcell
- CD4T
- CD8T
- Endothelial
- Epithelial
- Epithelial CDH
- Mac
- Stromal

**Supplementary Figure 8) CODEX samples annotated by cell type.** Every CODEX sample analyzed where each dot represents a cell centroid and is colored by the cell type.



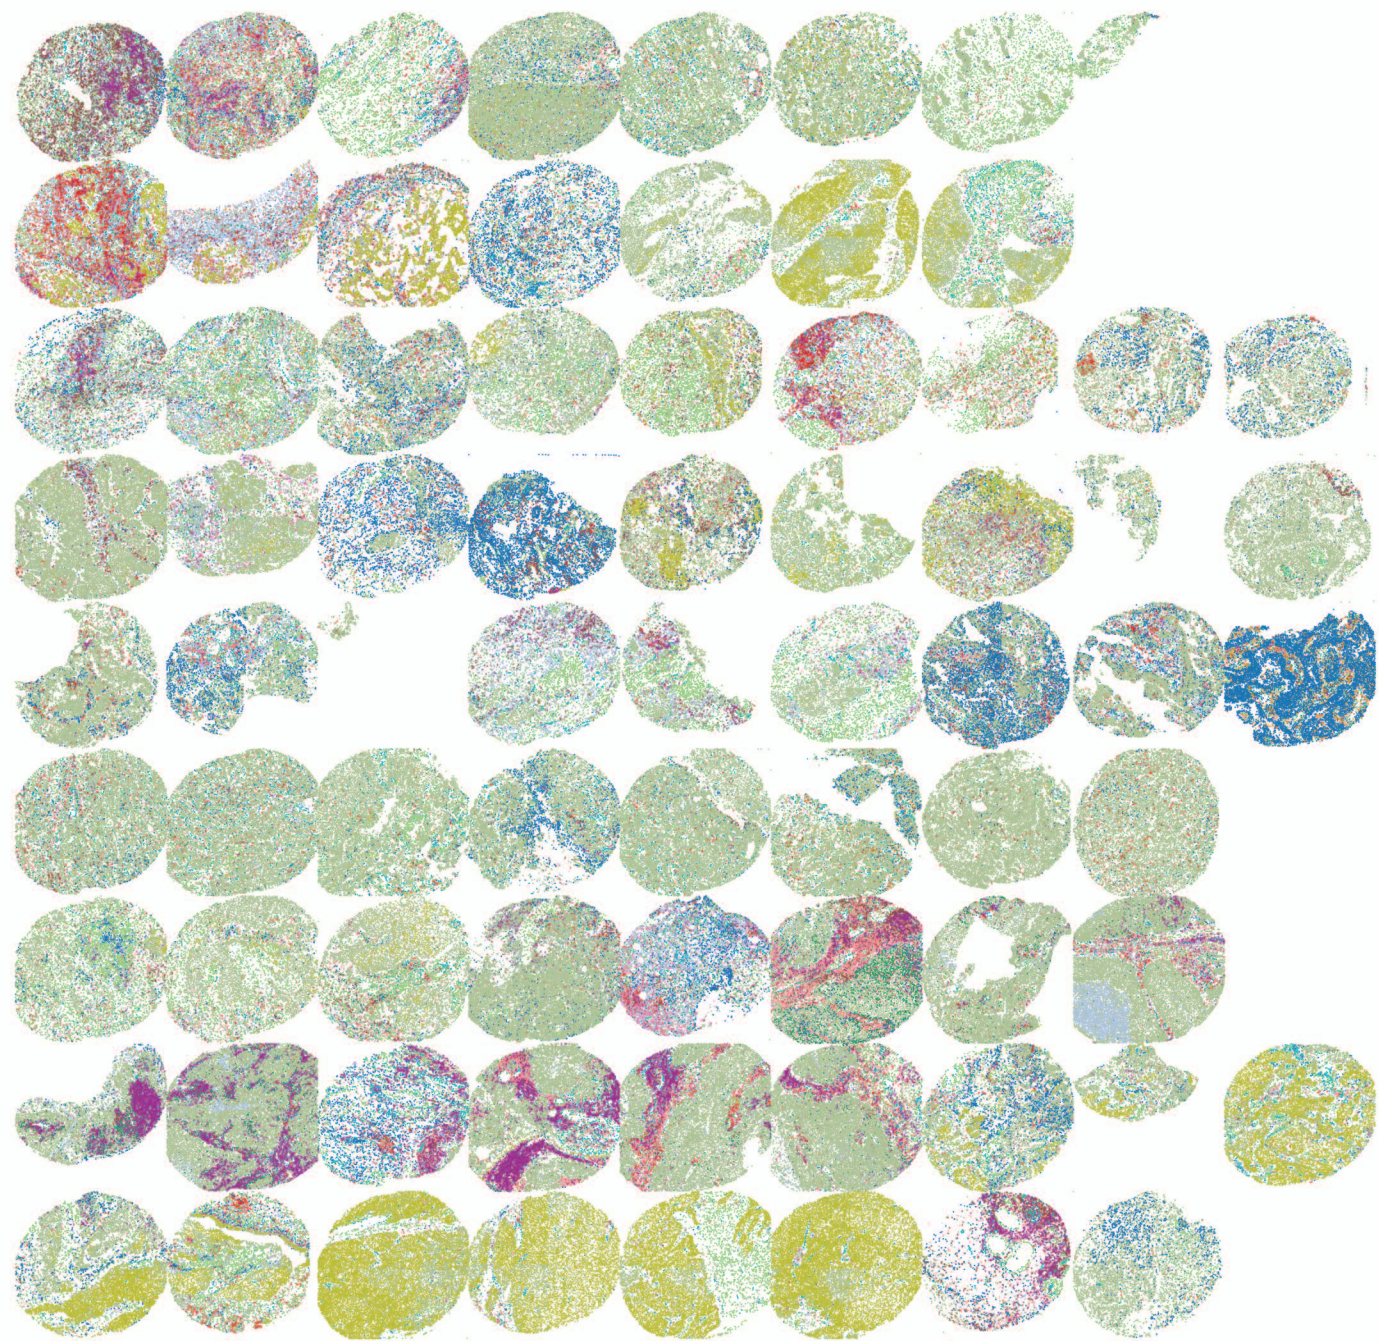

- Bcell
- CD4T
- CD4T Treg
- CD8T
- CD8T Trm
- CD8T activated
- CD8T exhausted
- Mac
- Endothelial
- Epithelial
- Epithelial KRT13/17
- Epithelial CDH12
- Stromal

**Supplementary Figure 9) CODEX samples annotated by cell subtype.** Every CODEX sample analyzed where each dot represents a cell centroid and is colored by the cell subtype.

**a**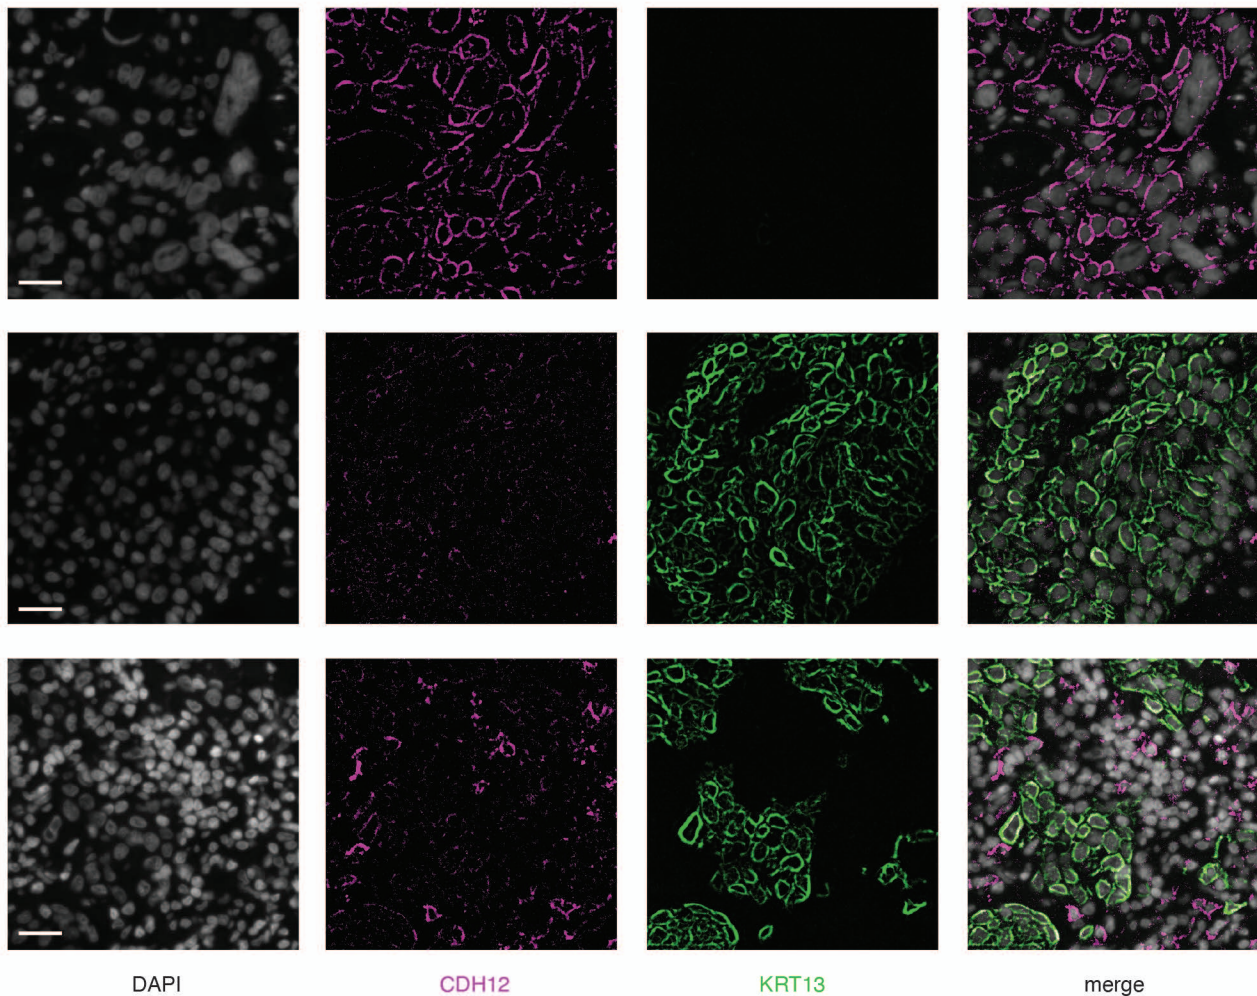**b**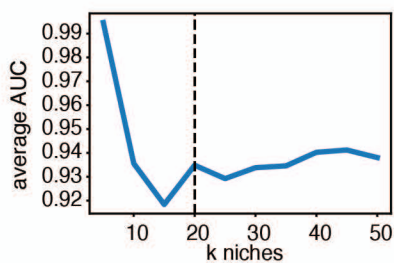**c**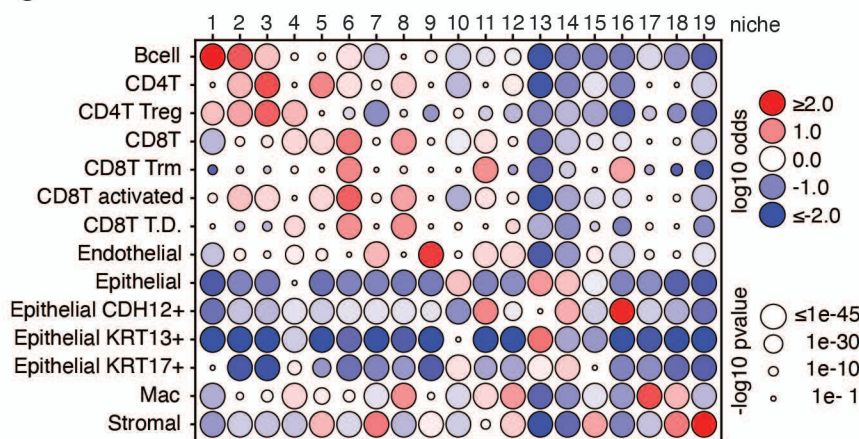

**Supplementary Figure 10) CODEX CDH12 and KRT13 staining and derivation of cellular niches (CN).** **a**, Example images showing CDH12 and KRT13 staining on epithelial cells. Scale bar is  $25\mu\text{m}$ . **b**, Average area under the receiver operating characteristic curve (AUC) derived from logistic regression models fit on cellular neighbor profiles (percentage of each broad cell type immediately surrounding each cell) clustered into  $k$  clusters. The value of  $k$  was varied from 5 to 50 in increments of 5. A high average AUC indicates high predictability of each niche from the others. The vertical dotted line at  $k=20$  indicates the number of cellular niches (CN) chosen for further analysis. **c**, Enrichment of subtypes assigned to each CN compared to any other CN. Dot hue and size reflect Fisher's exact test odds ratio and p-value, respectively.

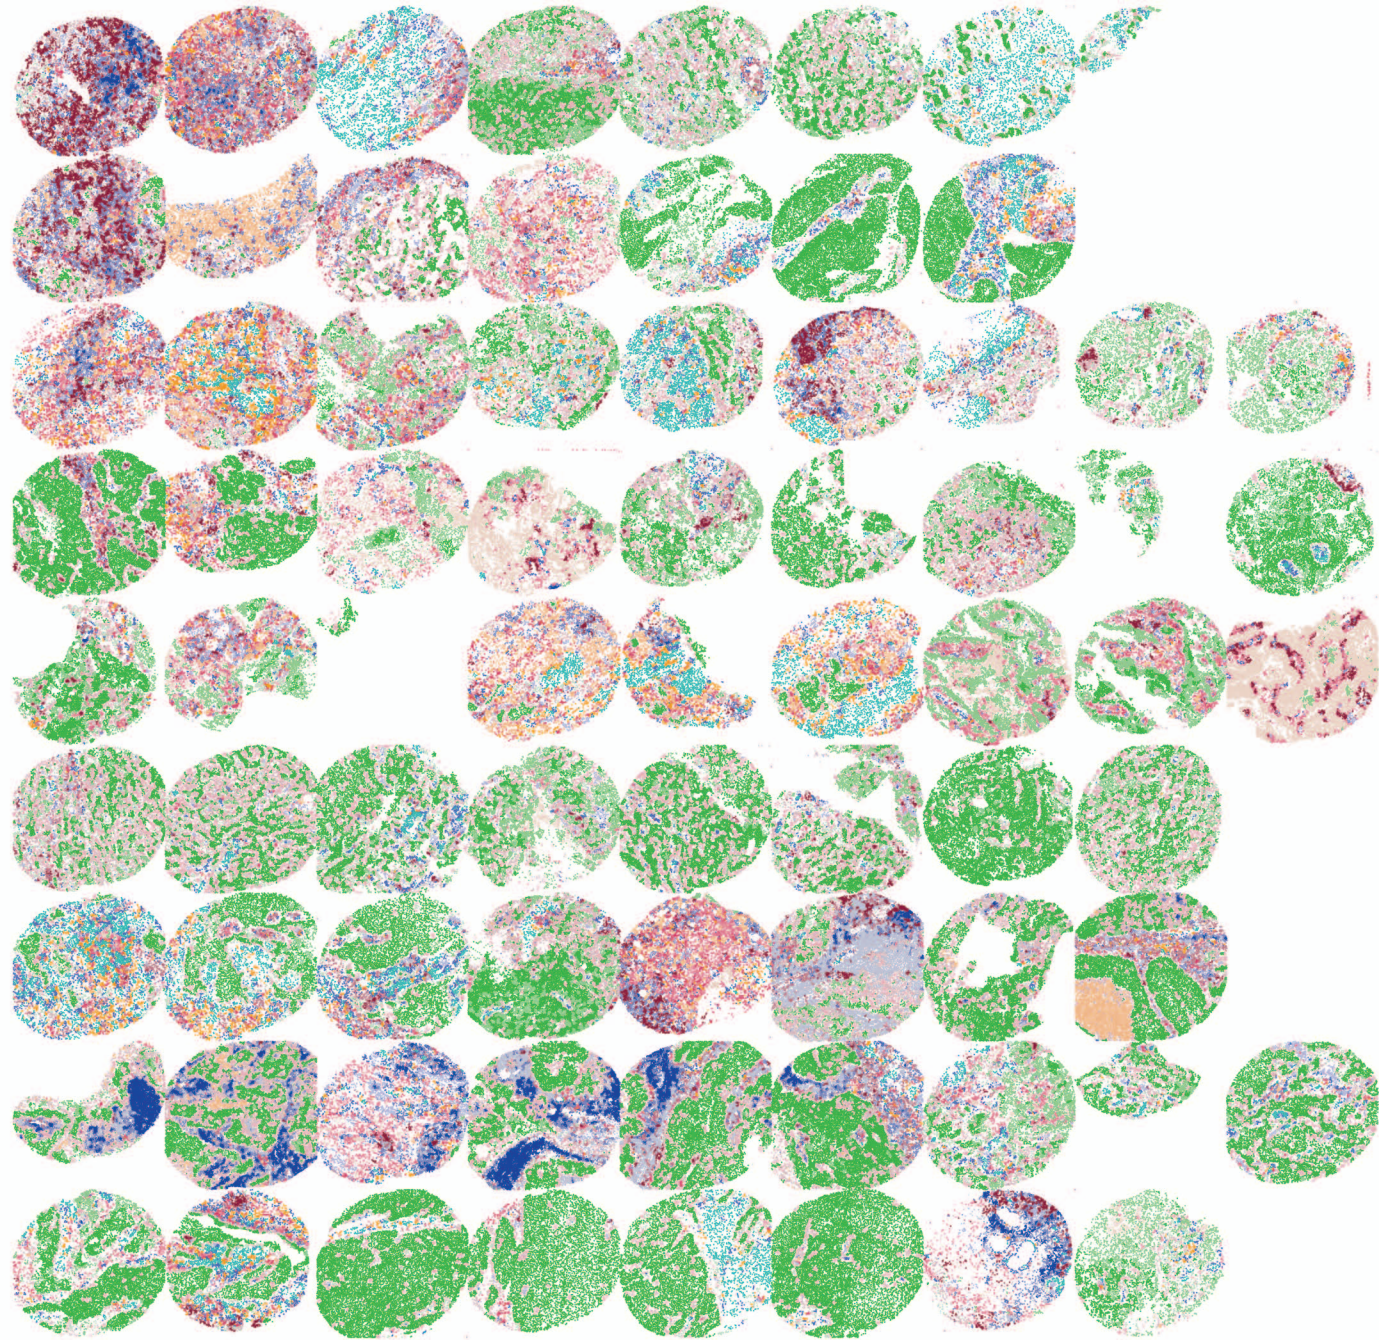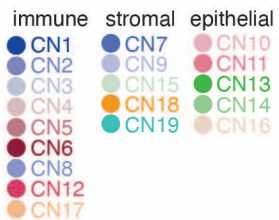

**Supplementary Figure 11) CODEX samples annotated by cellular niche (CN).** Every CODEX sample analyzed where each dot represents a cell centroid and is colored by the CN to which the cell belongs.

| Cohort ID | Grade | Invasive | Recurrence | Tobacco Use | Stage | Dead | Recurrence Days | Outcome                                            |
|-----------|-------|----------|------------|-------------|-------|------|-----------------|----------------------------------------------------|
| 36        | High  | Yes      | No         | Yes         | T3    | 0    |                 |                                                    |
| 54        | High  | Yes      |            | Yes         | T2    | 0    |                 |                                                    |
| 72        | High  | Yes      | No         | Yes         | T2    | 0    | 270             |                                                    |
| 593       | High  | Yes      | No         | Yes         | T2    | 1    | 76              | Died                                               |
| 674       | High  | Yes      | Yes        | No          | T2    | 0    | 322             | Mets to brain                                      |
| 702       | High  | Yes      | No         | Yes         | T4    | 0    | 40              |                                                    |
| 739       | High  | Yes      | No         | Yes         | T2    | 0    | 521             |                                                    |
| 752       | High  | Yes      | No         | Yes         | T2    | 0    | 9               |                                                    |
| 763       | High  | Yes      | Yes        | Yes         | T2    | 0    | 538             | Mets to brain                                      |
| 824       | High  | No       | No         | Yes         | T1    | 0    |                 |                                                    |
| 896       | High  | Yes      | Yes        | Yes         | T2    | 0    | 510             |                                                    |
| 912       | High  | Yes      | No         | No          | T2    | 0    | 47              | Pt refused continued chemo after initial diagnosis |
| 913       | High  | Yes      | No         | Yes         | T2    | 0    |                 |                                                    |
| 1246      | High  | Yes      | Yes        | Quit        | T2    | 1    |                 | Declined Adj                                       |
| 1126      | High  | Yes      | No         | No          | T2    | 0    | 852             |                                                    |
| 1204      | High  | Yes      | No         | Yes         | T2    | 0    | 729             |                                                    |
| 371       | High  | Yes      | No         | Yes         | T3    | 0    | 158             |                                                    |
| 419       | High  | Yes      | No         | Yes         | T2    | 0    | 54              |                                                    |
| 446       | High  | Yes      | No         | Yes         | T2    | 0    | 61              |                                                    |
| 485       | High  | Yes      | No         | Yes         | T2    | 0    | 112             |                                                    |
| 489       | High  | Yes      | No         | Yes         | T2    | 0    | 1236            |                                                    |
| 518       | High  | Yes      | No         | Yes         | T2    | 0    | 294             |                                                    |
| 59        | High  | Yes      | No         | Yes         | T2    | 1    | 178             | Dead                                               |
| 590       | High  | Yes      | No         | Yes         | T2    | 0    | 41              |                                                    |
| 8         | High  | Yes      | No         | No          | T2    | 1    | 150             | Dead                                               |

Supplementary Table 1 - Patient Clinical Characteristics

| Marker   | Clone        | Manufacturer      | Catalog #     | Barcode | Fluorophore | Final Dilution | Cycle | Exposure (ms) |
|----------|--------------|-------------------|---------------|---------|-------------|----------------|-------|---------------|
| CD8      | C8/144B      | Akoya Biosciences | 4250012       | BX026   | Atto550     | 400x           | 2     | 500           |
| CD4      | EPR6855      | Akoya Biosciences | 4350018       | BX003   | Cy5         | 400x           | 2     | 350           |
| PanCytok | AE-1/AE-3    | Akoya Biosciences | 4450020       | BX019   | AF750       | 200x           | 2     | 700           |
| aSMA     | 1A4          | Sigma             | A5228         | BX032   | Atto550     | 400x           | 3     | 500           |
| CD45     | D9M8I        | CST               | 13917BF       | BX021   | Cy5         | 400x           | 3     | 350           |
| PDGFRb   | Y92          | Abcam             | ab215978      | BX046   | AF750       | 400x           | 3     | 700           |
| CD49a    | TS2/7        | BioLegend         | 328302        | BX002   | Atto550     | 400x           | 4     | 500           |
| CD68     | KP1          | Akoya Biosciences | 4350019       | BX015   | Cy5         | 400x           | 4     | 350           |
| CD31     | EP3095       | Akoya Biosciences | 4450017       | BX001   | AF750       | 400x           | 4     | 700           |
| CD103    | ITGAE/2063   | Abcam             | ab237854      | BX005   | Atto550     | 400x           | 5     | 500           |
| HLA-DR   | EPR3692      | Akoya Biosciences | 4450029       | BX033   | Cy5         | 200x           | 5     | 350           |
| UPK3     | EPR14420     | Abcam             | ab239006      | BX025   | AF750       | 50x            | 5     | 700           |
| GATA3    | L50-823      | BD Biosciences    | 558686        | BX014   | Atto550     | 400x           | 6     | 500           |
| CD3e     | EP449E       | Akoya Biosciences | 4450030       | BX045   | Cy5         | 400x           | 6     | 350           |
| Ki-67    | SolA15       | Thermo-Fisher     | 14-5698-82    | BX049   | AF750       | 100x           | 6     | 700           |
| CDH18    | 6F7          | Thermo-Fisher     | H00001016-M01 | BX029   | Atto550     | 400x           | 7     | 500           |
| CDH12    | Poly         | LSBio             | LS-B11408     | BX042   | Cy5         | 200x           | 7     | 350           |
| KRT13    | EPR3671      | Abcam             | ab239918      | BX034   | AF750       | 200x           | 7     | 700           |
| KRT17    | KRT17/778    | Abcam             | ab212553      | BX020   | Atto550     | 400x           | 8     | 500           |
| CK5/6    | D5/16B4      | Sigma             | MAB1620       | BX006   | Cy5         | 400x           | 8     | 350           |
| CDH1     | 4A2C7        | Thermo-Fisher     | 33-4000       | BX028   | AF750       | 50x            | 8     | 700           |
| PD-1     | NAT105       | Abcam             | ab201811      | BX023   | Atto550     | 400x           | 9     | 500           |
| CD11c    | 118/A5       | Akoya Biosciences | 4350020       | BX024   | Cy5         | 400x           | 9     | 350           |
| KRT20    | 2G3-1C8      | LSBio             | LS-B4527      | BX022   | AF750       | 400x           | 9     | 700           |
| CD69     | EPR21814     | Abcam             | ab234512      | BX017   | Atto550     | 400x           | 10    | 500           |
| PD-L2    | D7U8C        | CST               | 82723BF       | BX027   | Cy5         | 200x           | 10    | 350           |
| CD20     | L26          | Akoya Biosciences | 4450018       | BX007   | AF750       | 400x           | 10    | 700           |
| PD-L1    | 28-8         | Abcam             | ab209889      | BX047   | Atto550     | 400x           | 11    | 500           |
| FOXP3    | PCH101       | Thermo-Fisher     | 14-4776-82    | BX030   | Cy5         | 400x           | 11    | 350           |
| ERBB2    | 3B5          | Abcam             | ab16901       | BX031   | AF750       | 200x           | 11    | 700           |
| GZMB     | 496B         | Thermo-Fisher     | 14-8889-82    | BX035   | Atto550     | 400x           | 12    | 500           |
| CD44     | G44-26 (C26) | BD Biosciences    | 555476        | BX036   | Cy5         | 400x           | 12    | 350           |
| CD45RO   | UCHL1        | BioLegend         | 304202        | BX040   | AF750       | 100x           | 12    | 700           |
| LAG3     | D2G40        | CST               | 15372BF       | BX041   | Atto550     | 400x           | 13    | 500           |
| CD45RA   | HI100        | BioLegend         | 304102        | BX004   | AF750       | 100x           | 13    | 700           |

Supplementary Table 2 - CODEX antibodies details
