# Supplementary material for: An N-Cadherin 2 expressing epithelial cell subpopulation predicts response to surgery, chemotherapy and immunotherapy in bladder cancer
Source: PubMed Central journal article supplement (PMC8361097; doi:10.1038/s41467-021-25103-7), 2021-08-12
Supplement: 41467_2021_25103_MOESM2_ESM.pdf [file 41467_2021_25103_MOESM2_ESM.pdf]

## **Description of Additional Supplementary Files**

**Supplementary Data 1:** Complete differential gene expression analysis results for MIBC epithelial clusters

**Supplementary Data 2:** TCGA samples used (N=259)

**Supplementary Data 3:** Gene signatures used for ssGSEA analysis of bulk RNA-seq data
